1 **Computational anatomy and geometric shape analysis enables analysis of complex**  
2 **craniofacial phenotypes in zebrafish**

3 Running title: Craniofacial zebrafish phenotype

4 Kelly M. Diamond<sup>1\*</sup>, Sara M. Rolfe<sup>1,2</sup>, Ronald Y. Kwon<sup>3,4</sup>, A. Murat Maga<sup>1,5</sup>

5 <sup>1</sup> Center for Developmental Biology and Regenerative Medicine, Seattle Children's Research  
6 Institute, Seattle, WA, USA

7 <sup>2</sup> Friday Harbor Marine Laboratories, University of Washington, San Juan, WA, USA

8 <sup>3</sup> Department of Orthopedics and Sports Medicine, University of Washington, Seattle, WA, USA

9 <sup>4</sup> Institute for Stem Cell and Regenerative Medicine, University of Washington, Seattle, WA, USA

10 <sup>5</sup> Division of Craniofacial Medicine, Department of Pediatrics, University of Washington, Seattle,  
11 WA, USA

12 \*Corresponding author: [Kelly.Diamond@SeattleChildrens.org](mailto:Kelly.Diamond@SeattleChildrens.org)

13

14 **Key words:** cranial morphology, osteogenesis imperfecta, geometric morphometrics,  
15 computational anatomy

16

17

18

19

20

21

22

23 **Summary statement**

24 A computational anatomy approach offers a potential pipeline for high throughput screening of  
25 complex zebrafish craniofacial phenotypes, an important model system for the study of  
26 development, evolution, and human diseases.

27

28

29

## 30 **Abstract**

31 Due to the complexity of fish skulls, previous attempts to classify craniofacial phenotypes have  
32 relied on qualitative features or 2D landmarks. In this work we aim to identify and quantify  
33 differences in 3D craniofacial phenotypes in adult zebrafish mutants. We first estimate a  
34 synthetic 'normative' zebrafish template using microCT scans from a sample pool of wildtype  
35 animals using the Advanced Normalization Tools (ANTs). We apply a computational anatomy  
36 (CA) approach to quantify the phenotype of zebrafish with disruptions in *bmp1a*, a gene  
37 implicated in later skeletal development and whose human ortholog when disrupted is  
38 associated with Osteogenesis Imperfecta. Compared to controls, the *bmp1a* fish have larger  
39 otoliths and exhibit shape differences concentrated around the operculum, anterior frontal,  
40 and posterior parietal bones. Moreover, *bmp1a* fish differ in the degree of asymmetry. Our CA  
41 approach offers a potential pipeline for high throughput screening of complex fish craniofacial  
42 phenotypes, especially those of zebrafish which are an important model system for testing  
43 genome to phenome relationships in the study of development, evolution, and human diseases.

## 44 **Introduction**

45 The fish craniofacial skeleton has long functioned as an archetype system for elucidating  
46 genetic and environmental contribution to phenotype in vertebrates. In the context of  
47 development, studies have focused on the genetic mechanisms that shape the cranial skeleton  
48 (Kimmel et al., 2020; Miller et al., 2007). Craniofacial analyses have been used to understand  
49 the pathways that have enabled morphological evolution (Kimmel et al., 2005), phenotypic  
50 plasticity (Navon et al., 2020), and adaptive radiations (Powder and Albertson, 2016) in fishes.  
51 Additionally, zebrafish are developing as a model system for quantifying phenotypic variability  
52 associated with human bone diseases, such as Osteogenesis Imperfecta (Busse et al., 2019;  
53 Gistelink et al., 2018; Kwon et al., 2019). A longstanding challenge to analyzing the fish  
54 craniofacial skeleton is accurately capturing phenotypes that involve subtle alterations and  
55 complex 3D changes, including potential asymmetric alterations.

56 The traditional methods for quantifying cranial morphology use manually-placed  
57 homologous landmark points on 2D images of the lateral view of the head (i.e. Sidlauskas,  
58 2008). However, manual placement limits potential for rapid-throughput applications. Further

59 the requirement for homologous structures limits landmark placement across the skull, and  
60 hence may miss the phenotypic variation in these areas. While microCT can help realize 3D  
61 structures, 3D landmark placement is complex as visualizations are dependent on both the  
62 scanner and rendering software settings used. Moreover, because of the close proximity of  
63 bones, segmentation-based approaches that are useful for axial skeleton are not amenable to  
64 those in the head. There is an urgent need to develop robust methods for phenotyping in the  
65 craniofacial skeleton that are sensitive to complex 3D changes while being amenable to rapid-  
66 throughput analyses.

67 Here, we propose using an atlas-based computational anatomy (CA) approach to build a  
68 template and then using a pseudo-landmark pipeline to identify areas of the skull that vary  
69 among mutant and wildtype fish. Atlas-based approaches estimate an unbiased anatomical  
70 ‘template’ from a group of images (Guimond et al., 2006), and then use this template to the  
71 basis to assess shape differences among groups of interest (Ashburner and Friston, 2000). Atlas-  
72 based approaches have been used to characterize phenotypes in many neuroimaging studies in  
73 humans, in fetal mice (KOMP2 project) as well as in the mouse cranial skeleton (Maga et al.,  
74 2017; Toussaint et al., 2020). We define pseudo-landmarks here as landmarks that are not  
75 homologous but evenly cover the surface of our fish skulls.

76 We apply these methods to zebrafish with mutations in *bmp1a*, a gene implicated in  
77 later skeletal development. In humans, Bone Morphogenetic Protein 1 (BMP1) encodes for a  
78 secreted protein involved in procollagen processing. Individuals with mutations in BMP1 exhibit  
79 increased bone mineral density and recurrent fractures characteristic of Osteogenesis  
80 Imperfecta (OI; Asharani et al., 2012). Severe forms of OI are frequently associated with  
81 craniofacial abnormalities (Dagdeviren et al., 2019). Previous work in *bmp1a* and other  
82 zebrafish OI models have identified phenotypic abnormalities in the axial skeleton (Hur et al.,  
83 2017). However, due to the complicated structure of the fish cranial skeleton, craniofacial  
84 abnormalities in zebrafish OI models have mostly focused on qualitative phenotypes (Gistelink  
85 et al., 2018), and little work has been done to quantify complex cranial phenotype. Here, we  
86 report complex craniofacial phenotype arising from disruptions in *bmp1a*. Our methods aim to  
87 quantify the cranial phenotype associated with mutations in zebrafish with minimal user

88 intervention so that large scale studies can examine phenotype-genotype associations in the  
89 skeletal system in a high-throughput

## 90 **Methods**

91 Generation of mutant animals and microCT scanning were described in Watson et al., 2020. We  
92 used a total of 23 wildtype fish from two clutches (“wildtype fish”) to build our atlas and used  
93 12 *bmp1a* somatic mutants (“*bmp1a* fish”), from a single clutch. Watson et al., 2020 performed  
94 a comparison of *bmp1a* somatic and germline mutants and showed that somatic *bmp1a*  
95 mutants recapitulate germline *bmp1a* mutant phenotypes but possess additional phenotypic  
96 variability due to mosaicism. We focused our analyses on *bmp1a* somatic mutants as they  
97 provide a real-world sample of phenotypic variability likely to be encountered in CRISPR-based  
98 reverse genetic screens (Shah et al., 2015; Watson et al., 2020). Whole-body microCT images  
99 were acquired with a 21 micron voxel size.

### 100 *Atlas Building*

101 To investigate potential asymmetry patterns, we built a symmetrical atlas of wildtype fish  
102 (N=23) by first reflecting all volumes along the sagittal plane. A symmetric atlas was generated  
103 using the antsMultivariateTemplateConstruction2.sh script as provided by the Advance  
104 Normalization Tools (Avants et al., 2014), using the default settings. Atlas building script  
105 initiates with a linear average of all samples, to which all samples are deformable registered to  
106 (Figure 1). The resultant deformation fields are applied to samples, and a new average is  
107 estimated and then used as a new reference for the next step of registrations. Four iterations  
108 were sufficient to obtain a symmetrical and anatomically detailed template.

### 109 *Atlas validation*

110 First, we reviewed the resultant atlas qualitatively by investigating the spatial arrangement of  
111 bones in 3D rendering. To quantitatively validate the atlas and our computational anatomy  
112 framework, we created segmentations of individual otoliths from every sample manually using  
113 the open-source 3D Slicer program (Fedorov et al., 2012). We chose otoliths because they are  
114 dense, spread out along the dorsoventral axis of the crania, and do not touch any bones, which  
115 minimized the potential for error in our manual segmentations that serve as the ground truth  
116 data. The otoliths from the atlas were segmented in the same manner. Next, we deformably

117 registered every sample, including the mutants, to our atlas using the ANTsR package, and  
118 applied the resultant transformation field to our atlas otolith segmentation to map them  
119 directly onto the subject space. From this mapping, we calculated the volumes of CA derived  
120 segmentation and statistically compared them to ground truth. All statistical analysis and image  
121 registrations were done using the R extensions of the ANTs ecosystem (Avants, 2020).

122 *Analysis of ZF cranial shape difference in wild-types and mutants.*

123 We first sparsely placed manual landmarks (N=8) on all subjects in our study and performed a  
124 Euclidian Distance Matrix Analysis (EDMA) on the manual landmarks using the EDMaInR  
125 package in R (<https://github.com/psolymos/EDMaInR>). In the EDMA analysis we used the  
126 *bmp1a* fish as the numerator and wildtype fish as the denominator. Landmarks used included  
127 (1) posterior most point of parietal (2) anterior most point of frontal (3) posterior most point of  
128 maxilla (4) left ventral most point of lower jaw (5) anteriodorsal most point of 1st vertebrae (6)  
129 right ventral most point of lower jaw (7) left postocular process and (8) right postocular process  
130 (Figure S1).

131 To examine the overall shape variation, we compared densely spaced pseudo-landmark  
132 points between *bmp1a* and wildtype fish. To place pseudo-landmark points on each of our  
133 specimens, we first created 3D models of from our ct volumes using the Segment Editor module  
134 of 3D Slicer (Fedorov et al., 2012). To generate a set of pseudo-landmark points on our atlas  
135 model, we used the PseudoLMGenerator module in the SlicerMorph extension of 3D Slicer  
136 which uses the original mesh geometry and a sagittal plane as the axis of symmetry, to  
137 generate a dense point cloud (Rolfe et al., 2021). One author (KMD) then went through the  
138 pseudo-landmarks and removed points that were on both jaws and the pectoral girdle using the  
139 MarkupEditor tool in 3D Slicer (Rolfe et al., 2021; Figure 1). Both of these structures are highly  
140 prone to plastic post-mortem deformation due to handling and preservation, as such they  
141 represent confounding non-biological variation. To transfer the pseudo-landmark points from  
142 the atlas to all other models in the study, we used the ALPACA module in the SlicerMorph  
143 extension of 3D Slicer, which uses linear and deformable point cloud registration (Porto et al.,  
144 2020). We used the default settings and skipped the scaling option to transfer pseudo-  
145 landmarks from the atlas to all meshes in our sample (Figures 1, S2).

146 To examine differences between *bmp1a* and wildtype fish, we ran a Generalized  
147 Procrustes Analyses (GPA) on the 372 pseudo-landmark points (pLMs), allowing all pLMs to  
148 slide along the surface, using the geomorph package in R (Adams and Otárola-Castillo, 2013).  
149 We ran a symmetry analysis on the GPA coordinates using the bilat.symmetry function in the  
150 geomorph package in R (Adams and Otárola-Castillo, 2013). From this output, we ran  
151 Procrustes ANOVAs to determine if the symmetric, and fluctuating asymmetric components of  
152 shape variation differ between groups. We also ran separate principal components analyses on  
153 both the symmetric and asymmetric components of variation from the symmetry analysis using  
154 the geomprph package in R (Adams and Otárola-Castillo, 2013). Visualizations were created in  
155 the SlicerMorph extension of 3D Slicer (Rolfe et al., 2021) and using ggplot in R (Wickham,  
156 2016).

## 157 **Results & Discussion**

158 When analyzing otoliths, we did not find significant differences between manually segmented  
159 volumes and atlas segmented volumes ( $t=-0.912$ ,  $p=0.363$ ; Figure S3), though there were some  
160 differences between some of the individual otoliths (Table S1; Figure S3). The most apparent  
161 difference between *bmp1a* and wildtype fish is that *bmp1a* fish have larger otoliths than  
162 wildtype fish, especially for the asteriscus, the largest otoliths in the zebrafish. This difference  
163 was consistent in both manually and CA segmented otoliths (Table 1; Figure S3). In contrast to  
164 bone formation, in which the mineral phase is primarily hydroxyapatite, otoliths are formed via  
165 an accumulation of calcium carbonate in the acellular endolymph of the fish inner ear (Payan et  
166 al., 2004). Previous work found higher tissue mineral density in *bmp1a* fish across the axial  
167 skeleton (Hur et al., 2017) and this result suggests potential influence of *bmp1a* on other  
168 pathways associated with mineralized tissues.

169 In our EDMA analysis of the 8 manually placed landmark points, we found overall  
170 differences between *bmp1a* and wildtype fish ( $T=1.577$ ,  $p<0.001$ ). In comparing form distance  
171 ratios among all landmark pairs, we found less similarity between landmarks placed at the  
172 anterior portion of the head (landmarks 2-4 and 6-8) in our dataset compared to the two  
173 posterior most placed landmarks (landmarks 1,5; Figure S1). However, these landmarks were

174 very sparsely placed and could be missing variation present in areas of the skull where  
175 traditional landmarks are sparse.

176 To see if there were areas of the skull that had greater variation than what could be  
177 determined from our EDMA analysis, we deployed a pseudo-landmark approach, placing 372  
178 geometrically placed pseudo-landmarks across the outer surface of the cranial skeleton.  
179 In our symmetry analysis of pseudo-landmark points, we found significant differences in  
180 symmetry between groups for both the symmetric ( $F=3.573$ ,  $Z=2.708$ ,  $p=0.011$ ) and asymmetric  
181 ( $F=3.830$ ,  $Z=3.124$ ,  $p=0.002$ ) components of shape variation. The symmetric differences in  
182 shape variation between groups were concentrated in the anterior frontal bone and the dorsal  
183 portion of the operculum (Figure 2). While the asymmetric differences between groups were  
184 concentrated in the posterior portion of the parietal bone and ventral portion of the operculum  
185 (Figure 2).

186 The results of separate PCA of each shape component suggest the asymmetric  
187 component of shape may be contributing more to the variation between groups in our dataset.  
188 For the symmetric component of variation, we found significant differences between *bmp1a*  
189 and wildtype fish along PC2, which explained 12.3% of the variation in the data ( $F=7.018$ ;  
190  $Z=2.006$ ;  $p=0.002$ ), but not along PC1, which explained 42.9% of the variation in the data  
191 ( $F=2.583$ ;  $Z=1.124$ ;  $p=0.092$ ; Figure 3) or any other PCs. Whereas in the asymmetric shape  
192 space, we found differences between groups along PC1, which explained 35.0% of the variation,  
193 ( $F=6.305$ ,  $Z=1.753$ ,  $p=0.009$ ), but not along PC2, which explained 17.1% of the variation ( $F=$   
194  $0.318$ ,  $Z=-0.374$ ,  $p=0.677$ ; Figure 3), or any other PCs. When we visualize the first two principal  
195 components of the symmetry analysis, we find that the positive axis of the first principal  
196 component is influenced by the symmetrical and asymmetrical components of the posterior  
197 operculum (Figure 3). The negative axis of PC1 differs among the components of symmetry,  
198 with the symmetric component concentrated in the anterior portion of the frontal bone and  
199 the asymmetric component concentrated in the lateral parietal and supraocular regions (Figure  
200 3). Very little variation is observed in the symmetric component of PC2, while the asymmetric  
201 component of this axis is again concentrated around the opercular and ocular regions (Figure  
202 3). As we removed pseudo-landmark points associated with areas of the skull that varied due to

203 preservation or scanning methods, these represent areas of interest for exploring how  
204 phenotype differs between mutant and wildtype fishes. Together these results provide  
205 evidence for phenotypic effects of the *bmp1a* mutation on the cranial phenotype of zebrafish.  
206 Future work should expand the number of families to ensure this is not unique to this particular  
207 family. We have shown how our pipeline can identify areas of greatest variation among groups  
208 of animals. In combination with additional morphological analyses, we hope this pipeline will  
209 enable researchers to better define the links between genotype and phenotype.

## 210 **Acknowledgements**

211 We thank members of the Maga lab and MSBL for feedback and development of this project.  
212 This project was partly supported by National Science Foundation grants An Integrated  
213 Platform for Retrieval, Visualization and Analysis of 3D Morphology from Digital Biological  
214 Collections (DBI/1759883) and Biology Guided Neural Networks for discovering phenotypic  
215 traits (OAC/1939505) to AMM. RYK was supported by NIH Grant AR074417.

216 **Competing Interests:** The authors declare no competing interests

## 217 **Author Contributions**

218 Contribution of fish and microCT scans: RYK. Conceptualization and methodology: all authors,  
219 Writing: KMD; Editing and approval: all authors.

## 220 **Data availability**

221 Atlas and pseudo-landmark points are available at:

222 [https://github.com/SlicerMorph/ZF\\_Skull\\_atlas/](https://github.com/SlicerMorph/ZF_Skull_atlas/)

## 223 **Literature Cited**

224 **Adams, D. C. and Otárola-Castillo, E.** (2013). Geomorph: An r package for the collection and  
225 analysis of geometric morphometric shape data. *Methods Ecol. Evol.* **4**, 393–399.

226 **Asharani, P. V., Keupp, K., Semler, O., Wang, W., Li, Y., Thiele, H., Yigit, G., Pohl, E., Becker, J.,  
227 Frommolt, P., et al.** (2012). Attenuated BMP1 function compromises osteogenesis, leading  
228 to bone fragility in humans and Zebrafish. *Am. J. Hum. Genet.* **90**, 661–674.

229 **Ashburner, J. and Friston, K. J.** (2000). Voxel-based morphometry - The methods. *Neuroimage*  
230 **11**, 805–821.

231 **Avants, B. B.** (2020). ANTsR: ANTs in R: Quantification tools for biomedical images version



- 232 0.5.7.5.
- 233 **Avants, B. B., Tustison, N. J. and Johnson, H.** (2014). Advanced Normalization Tools (ANTs). 1–  
234 41.
- 235 **Busse, B., Galloway, J. L., Gray, R. S., Harris, M. P. and Kwon, R. Y.** (2019). Zebrafish: An  
236 Emerging Model for Orthopedic Research. *J. Orthop. Res.*
- 237 **Dagdeviren, D., Tamimi, F., Lee, B., Sutton, R., Rauch, F. and Retrouvey, J.-M.** (2019). Dental  
238 and craniofacial characteristics caused by the p.Ser40Leu mutation in IFITM5. *Am. J. Med.*  
239 *Genet.* **176**, 65–70.
- 240 **Fedorov, A., Beichel, R., Kalpathy-Cramer, J., Finet, J., JC, F.-R., Pujol, S., Bauer, C., Jennings,**  
241 **D., Fennessy, F., Sonka, M., et al.** (2012). 3D Slicer as an image computing platform for the  
242 quantitative Imaging Network. *Magn Reson Imaging* **30**, 1323–1241.
- 243 **Gistelinck, C., Kwon, R. Y., Malfait, F., Symoens, S., Harris, M. P., Henke, K., Hawkins, M. B.,**  
244 **Fisher, S., Sips, P., Guillemyn, B., et al.** (2018). Zebrafish type I collagen mutants faithfully  
245 recapitulate human type I collagenopathies. *Proc. Natl. Acad. Sci. U. S. A.* **115**, E8037–  
246 E8046.
- 247 **Guimond, A., Meunier, J. and Thirion, J.** (2006). Average Brain Models : A Convergence Study  
248 To cite this version : Average Brain Models : A Convergence Study.
- 249 **Hur, M., Gistelinck, C. A., Huber, P., Lee, J., Thompson, M. H., Monstad-Rios, A. T., Watson, C.**  
250 **J., McMenamain, S. K., Willaert, A., Parichy, D. M., et al.** (2017). MicroCT-Based Phenomics  
251 in the Zebrafish Skeleton Reveals Virtues of Deep Phenotyping in a Distributed Organ  
252 System. *Elife* **6**, e26014.
- 253 **Kimmel, C. B., Ullmann, B., Walker, C., Wilson, C., Currey, M., Phillips, P. C., Bell, M. A.,**  
254 **Postlethwait, J. H. and Cresko, W. A.** (2005). Evolution and development of facial bone  
255 morphology in threespine sticklebacks. *Proc. Natl. Acad. Sci. U. S. A.* **102**, 5791–5796.
- 256 **Kimmel, C. B., Wind, A. L., Oliva, W., Ahlquist, S. D., Walker, C., Dowd, J., Blanco-Sánchez, B.,**  
257 **Titus, T. A., Batzel, P., Talbot, J. C., et al.** (2020). Transgene-mediated skeletal phenotypic  
258 variation in zebrafish. *J. Fish Biol.* 1–15.
- 259 **Kwon, R. Y., Watson, C. J. and Karasik, D.** (2019). Using zebrafish to study skeletal genomics.  
260 *Bone* **126**, 37–50.

- 261 **Maga, A. M., Tustison, N. J. and Avants, B. B.** (2017). A population level atlas of *Mus musculus*  
262 craniofacial skeleton and automated image-based shape analysis. *J. Anat.* **231**, 433–443.
- 263 **Miller, C. T., Swartz, M. E., Khuu, P. A., Walker, M. B., Eberhart, J. K. and Kimmel, C. B.** (2007).  
264 *mef2ca* is required in cranial neural crest to effect Endothelin1 signaling in zebrafish. *Dev.*  
265 *Biol.* **308**, 144–157.
- 266 **Navon, D., Male, I., Tetrault, E. R., Aaronson, B., Karlstrom, R. O. and Craig Albertson, R.**  
267 (2020). Hedgehog signaling is necessary and sufficient to mediate craniofacial plasticity in  
268 teleosts. *Proc. Natl. Acad. Sci. U. S. A.* **117**, 19321–19327.
- 269 **Payan, P., De Pontual, H., Bœuf, G. and Mayer-Gostan, N.** (2004). Endolymph chemistry and  
270 otolith growth in fish. *Comptes Rendus - Palevol* **3**, 535–547.
- 271 **Porto, A., Rolfe, S. M. and Maga, A. M.** (2020). ALPACA: a fast and accurate approach for  
272 automated landmarking of three-dimensional biological structures. *bioRxiv*.
- 273 **Powder, K. E. and Albertson, R. C.** (2016). Cichlid fishes as a model to understand normal and  
274 clinical craniofacial variation. *Dev. Biol.* **415**, 338–346.
- 275 **Rolfe, S., Pieper, S., Porto, A., Diamond, K., Winchester, J., Shan, S., Kirveslahti, H., Boyer, D.,**  
276 **Summers, A. and Maga, A. M.** (2021). SlicerMorph: An open and extensible platform to  
277 retrieve, visualize and analyze 3D morphology. *bioRxiv*.
- 278 **Shah, A. N., Davey, C. F., Whitebirch, A. C., Miller, A. C. and Moens, C. B.** (2015). Rapid reverse  
279 genetic screening using CRISPR in zebrafish. *Nat. Methods* **12**, 535–540.
- 280 **Sidlauskas, B.** (2008). Continuous and arrested morphological diversification in sister clades of  
281 characiform fishes: A phylomorphospace approach. *Evolution (N. Y.)*. **62**, 3135–3156.
- 282 **Toussaint, N., Redhead, Y., Liu, W., Fisher, E. M. C., Hallgrímsson, B., Tybulewicz, V. L. J.,**  
283 **Schnabel, J. A. and Green, J. B. A.** (2020). Application of high-resolution landmark-free  
284 morphometrics to a mouse model of Down Syndrome reveals a tightly localised cranial  
285 phenotype. *BioRxiv*.
- 286 **Watson, C. J., Monstad-Rios, A. T., Bhimani, R. M., Gistelínck, C., Willaert, A., Coucke, P., Hsu,**  
287 **Y. H. and Kwon, R. Y.** (2020). Phenomics-Based Quantification of CRISPR-Induced  
288 Mosaicism in Zebrafish. *Cell Syst.* **10**, 275-286.e5.
- 289 **Wickham, H.** (2016). *ggplot2: elegant graphics for data analysis*. Springer.

290 **Table and Figures**

291 **Table 1.** Welch two sample t-test for difference between mutants and wildtype fish for each  
292 pair of manually segmented otolith volumes. We provide the mean volumes(x) for mutants and  
293 wildtype groups, degrees of freedom (df), test statistic (t), p value (p), and confidence interval  
294 (UCL-LCL).

| Otolith          | x mutant<br>(mm <sup>3</sup> ) | x wildtype<br>(mm <sup>3</sup> ) | df     | t     | p     | UCL     | LCL   |
|------------------|--------------------------------|----------------------------------|--------|-------|-------|---------|-------|
| Left asteriscus  | 0.044                          | 0.039                            | 15.975 | 3.383 | 0.004 | 0.002   | 0.008 |
| Right asteriscus | 0.044                          | 0.040                            | 14.62  | 3.232 | 0.006 | 0.002   | 0.007 |
| Left lapilus     | 0.026                          | 0.025                            | 18.013 | 2.000 | 0.061 | -0.0007 | 0.003 |
| Right lapilus    | 0.026                          | 0.025                            | 17.693 | 1.554 | 0.138 | -0.0004 | 0.003 |
| Left sagitta     | 0.005                          | 0.005                            | 18.665 | 2.244 | 0.037 | 0.0003  | 0.009 |
| Right sagitta    | 0.005                          | 0.005                            | 15.375 | 1.902 | 0.076 | -0.0005 | 0.008 |

295

296

297

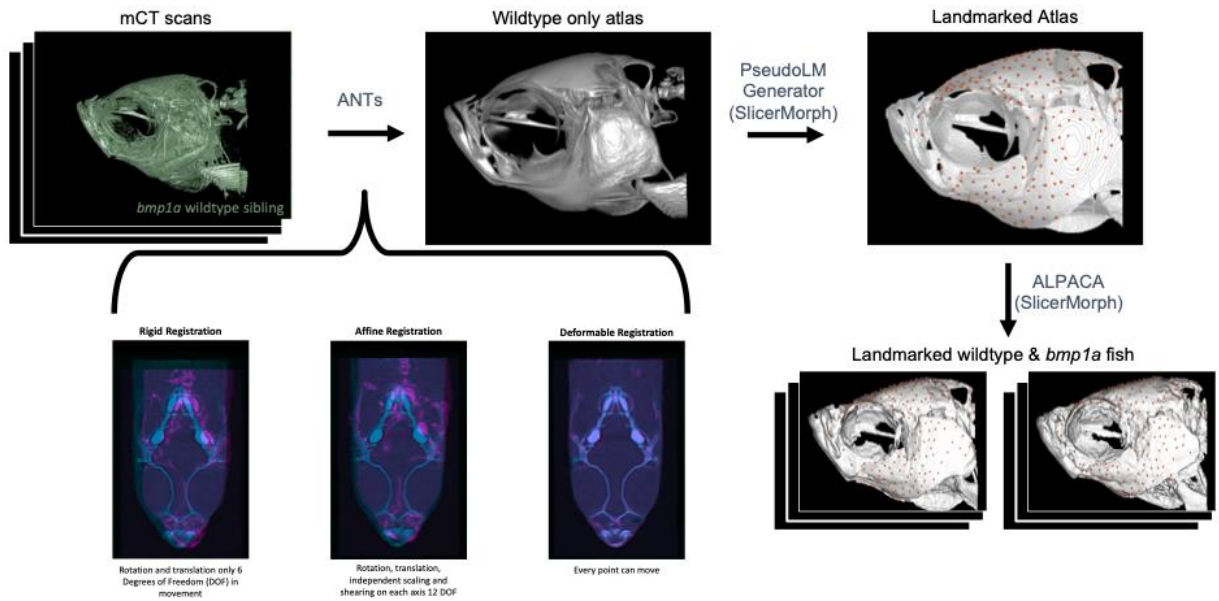

298

299 **Figure 1.** Pipeline for atlas building, pseudo-landmark generation, and transferring pseudo-  
300 landmarks to individual fish. Starting with microCT scans of wildtype fish ANTs, uses a series of  
301 rigid, affine, and deformable registrations to create an average image, or Atlas. The  
302 PseudoLMGenerator tool in SlicerMorph was used to place 372 pseudo-landmarks on the atlas.  
303 The ALPACA tool in SlicerMorph was used to transfer points from the atlas to wildtype and  
304 bmp1a fish for comparisons between groups.

305

306

307

308

309

310

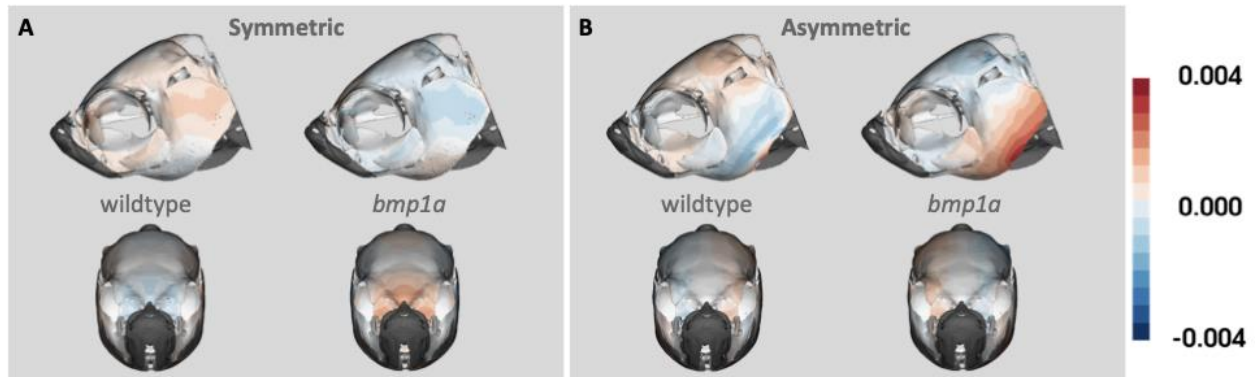

311

312 **Figure 2.** Heat map of (A) symmetric and (B) asymmetric components of shape variation. Lateral  
313 and anterior views are shown for each group (wildtype and *bmp1a*) within both components of  
314 shape variation. Colors show variation in shape from the symmetric atlas, with deeper colors  
315 representing greater variation from the atlas.

316

317

318

319

320

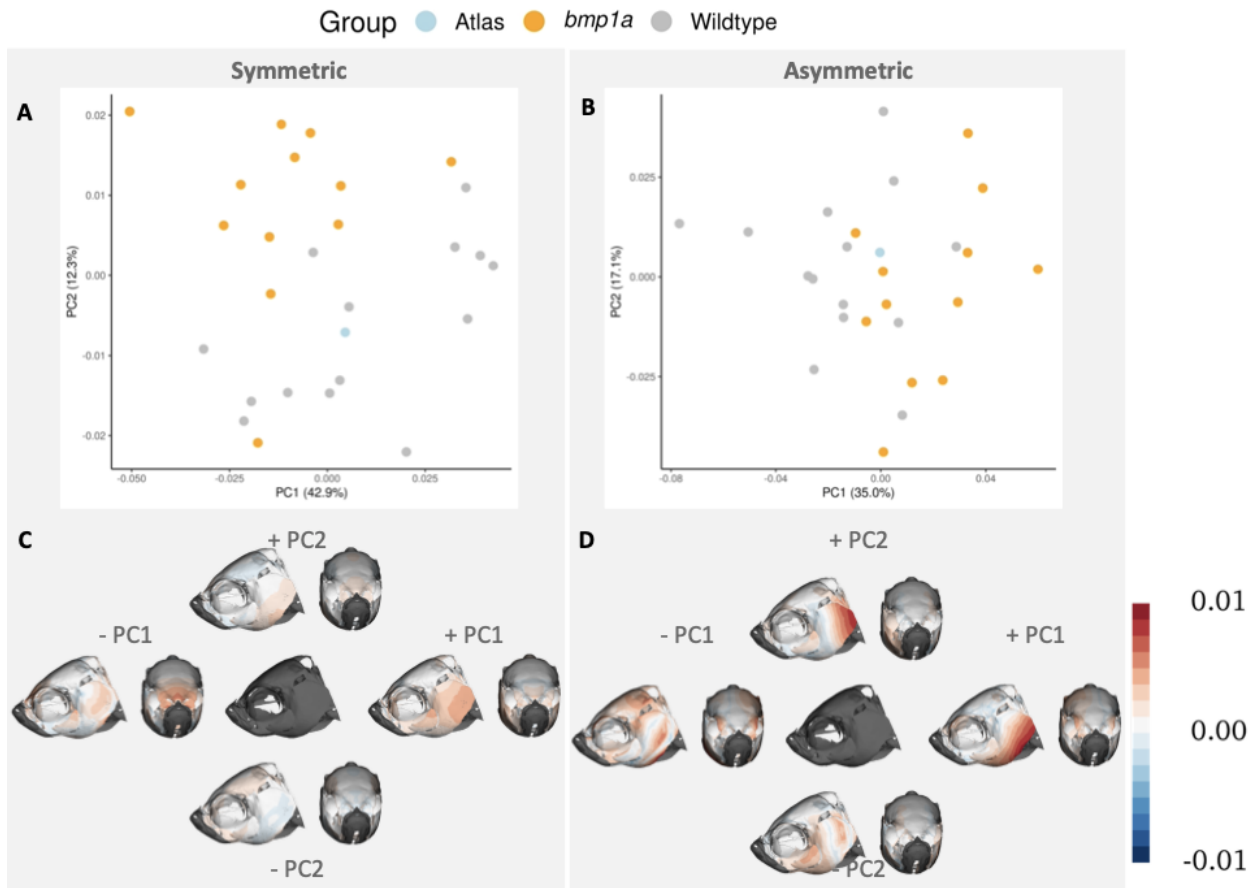

321

322 **Figure 3.** First two principal components of symmetry analysis. PC plots show separation of  
323 groups (represented by color) along the first and second PCs (A,B). Heat maps of the same PCs  
324 represent where shape variation occurs across each axis (C,D). Columns represent symmetric  
325 (A,C) and asymmetric (B,D) components of shape variation. The central image in C,D represent  
326 mean shape of each component. Color in C,D represents the Procrustes distance between the  
327 average shape and the shape occupying the ends of each PC axis.
